# Supplementary material
Source: MDPI journal article supplement (https://www.mdpi.com/2073-4352/10/12/1123)
Supplement: s1 [file s1]

# Elastic Coefficients of $\beta$ -HMX as Functions of Pressure and Temperature from Molecular Dynamics

Andrey Pereverzev<sup>1</sup> and Tommy Sewell<sup>2</sup>

<sup>1</sup> University of Missouri - Columbia; pereverzeva@missouri.edu

<sup>2</sup> University of Missouri - Columbia; sewellt@missouri.edu

## Supplemental Material

Table S1. Equilibrium unit-cell volumes and lattice parameters for  $\beta$ -HMX as functions of temperature and pressure.

| $T$ (K) | $P$ (GPa) | $a$ (Å) | $b$ (Å) | $c$ (Å) | $\beta$ (deg) | $V$ (Å <sup>3</sup> ) |
|---------|-----------|---------|---------|---------|---------------|-----------------------|
| 300     | $10^{-4}$ | 6.587   | 10.468  | 7.692   | 98.72         | 524.27                |
|         | 5         | 6.329   | 9.748   | 7.319   | 97.65         | 447.47                |
|         | 10        | 6.253   | 9.421   | 7.105   | 97.24         | 415.22                |
|         | 20        | 6.154   | 9.024   | 6.852   | 96.71         | 377.95                |
|         | 30        | 6.076   | 8.765   | 6.698   | 96.35         | 354.50                |
| 500     | $10^{-4}$ | 6.623   | 10.667  | 7.727   | 98.93         | 539.25                |
|         | 5         | 6.326   | 9.818   | 7.346   | 97.74         | 452.12                |
|         | 10        | 6.252   | 9.471   | 7.123   | 97.33         | 418.31                |
|         | 20        | 6.158   | 9.061   | 6.857   | 96.78         | 379.90                |
|         | 30        | 6.081   | 8.794   | 6.698   | 96.41         | 355.96                |
| 700     | $10^{-4}$ | 6.678   | 10.967  | 7.742   | 99.36         | 559.39                |
|         | 5         | 6.320   | 9.899   | 7.373   | 97.85         | 456.94                |
|         | 10        | 6.250   | 9.525   | 7.140   | 97.43         | 421.47                |
|         | 20        | 6.161   | 9.100   | 6.861   | 96.86         | 381.86                |
|         | 30        | 6.085   | 8.825   | 6.698   | 96.47         | 357.41                |
| 900     | 5         | 6.308   | 9.994   | 7.399   | 97.98         | 461.94                |
|         | 10        | 6.243   | 9.584   | 7.162   | 97.55         | 424.75                |
|         | 20        | 6.163   | 9.141   | 6.863   | 96.95         | 383.83                |
|         | 30        | 6.090   | 8.858   | 6.696   | 96.54         | 358.87                |
| 1100    | 5         | 6.293   | 10.111  | 7.415   | 98.11         | 467.10                |
|         | 10        | 6.227   | 9.648   | 7.192   | 97.70         | 428.19                |
|         | 20        | 6.165   | 9.187   | 6.865   | 97.05         | 385.83                |
|         | 30        | 6.094   | 8.894   | 6.693   | 96.62         | 360.35                |

Table S2. Full 6×6 matrix of elastic coefficients  $C_{ij}$  of  $\beta$ -HMX in units of GPa at 300 K and 1 atm ( $10^{-4}$  GPa). The first column on the left and the top row are indices  $i$  and  $j$ . The matrix is very close to being symmetric. Sixteen coefficients are close to zero as expected for the monoclinic crystal.

|   | 1                   | 2                   | 3                   | 4                    | 5                     | 6                    |
|---|---------------------|---------------------|---------------------|----------------------|-----------------------|----------------------|
| 1 | <b>22.97 ± 0.04</b> | <b>9.21 ± 0.05</b>  | <b>12.35 ± 0.04</b> | -0.01 ± 0.08         | <b>-0.43 ± 0.01</b>   | -0.004 ± 0.009       |
| 2 | <b>9.20 ± 0.04</b>  | <b>22.62 ± 0.05</b> | <b>12.40 ± 0.04</b> | -0.011 ± 0.009       | <b>4.46 ± 0.02</b>    | -0.010 ± 0.009       |
| 3 | <b>12.28 ± 0.04</b> | <b>12.34 ± 0.05</b> | <b>21.67 ± 0.04</b> | -0.001 ± 0.008       | <b>1.83 ± 0.01</b>    | -0.007 ± 0.008       |
| 4 | 0.00 ± 0.02         | 0.01 ± 0.03         | 0.00 ± 0.02         | <b>8.645 ± 0.004</b> | 0.001 ± 0.006         | <b>2.247 ± 0.005</b> |
| 5 | <b>-0.43 ± 0.02</b> | <b>4.48 ± 0.02</b>  | <b>1.86 ± 0.02</b>  | -0.014 ± 0.004       | <b>10.407 ± 0.006</b> | -0.003 ± 0.005       |
| 6 | 0.00 ± 0.02         | 0.00 ± 0.02         | -0.02 ± 0.02        | <b>2.250 ± 0.004</b> | 0.002 ± 0.006         | <b>9.527 ± 0.005</b> |

Table S3. Full 6×6 matrix of elastic coefficients  $C_{ij}$  of  $\beta$ -HMX in units of GPa at 700 K and 1 atm ( $10^{-4}$  GPa). The first column on the left and the top row are indices  $i$  and  $j$ . The matrix is very close to being symmetric. Sixteen coefficients are close to zero as expected for the monoclinic crystal.

|   | 1                   | 2                   | 3                   | 4                    | 5                    | 6                    |
|---|---------------------|---------------------|---------------------|----------------------|----------------------|----------------------|
| 1 | <b>12.78 ± 0.06</b> | <b>4.84 ± 0.07</b>  | <b>7.11 ± 0.05</b>  | -0.01 ± 0.01         | <b>-0.09 ± 0.02</b>  | 0.03 ± 0.02          |
| 2 | <b>4.90 ± 0.06</b>  | <b>12.09 ± 0.07</b> | <b>6.48 ± 0.05</b>  | 0.01 ± 0.01          | <b>2.92 ± 0.02</b>   | 0.04 ± 0.02          |
| 3 | <b>7.08 ± 0.06</b>  | <b>6.37 ± 0.08</b>  | <b>14.05 ± 0.06</b> | 0.02 ± 0.01          | <b>0.73 ± 0.02</b>   | 0.04 ± 0.02          |
| 4 | -0.02 ± 0.03        | -0.02 ± 0.03        | 0.01 ± 0.02         | <b>6.051 ± 0.007</b> | 0.010 ± 0.009        | <b>1.262 ± 0.009</b> |
| 5 | <b>0.09 ± 0.03</b>  | <b>2.95 ± 0.04</b>  | <b>0.77 ± 0.03</b>  | 0.005 ± 0.006        | <b>6.147 ± 0.009</b> | 0.007 ± 0.008        |
| 6 | 0.00 ± 0.03         | 0.00 ± 0.04         | 0.01 ± 0.03         | <b>1.281 ± 0.007</b> | -0.005 ± 0.008       | <b>6.316 ± 0.008</b> |

Table S4. Full 6×6 matrix of elastic coefficients  $C_{ij}$  of  $\beta$ -HMX in units of GPa at 1100 K and 30 GPa. The first column on the left and the top row are indices  $i$  and  $j$ . The matrix is very close to being symmetric. Sixteen coefficients are close to zero as expected for the monoclinic crystal.

|   | 1                    | 2                    | 3                    | 4                   | 5                    | 6                   |
|---|----------------------|----------------------|----------------------|---------------------|----------------------|---------------------|
| 1 | <b>253.4 ± 0.1</b>   | <b>135.0 ± 0.1</b>   | <b>165.01 ± 0.07</b> | -0.03 ± 0.04        | <b>-24.31 ± 0.04</b> | -0.01 ± 0.04        |
| 2 | <b>135.0 ± 0.1</b>   | <b>200.82 ± 0.09</b> | <b>158.36 ± 0.07</b> | 0.06 ± 0.05         | <b>25.21 ± 0.05</b>  | -0.08 ± 0.04        |
| 3 | <b>165.10 ± 0.09</b> | <b>158.5 ± 0.1</b>   | <b>193.90 ± 0.06</b> | 0.00 ± 0.04         | <b>7.47 ± 0.04</b>   | -0.05 ± 0.04        |
| 4 | -0.02 ± 0.05         | -0.03 ± 0.05         | -0.07 ± 0.04         | <b>40.52 ± 0.02</b> | -0.01 ± 0.02         | <b>13.14 ± 0.02</b> |
| 5 | <b>-24.39 ± 0.05</b> | <b>25.17 ± 0.06</b>  | <b>7.40 ± 0.05</b>   | 0.03 ± 0.02         | <b>76.64 ± 0.02</b>  | 0.01 ± 0.02         |
| 6 | 0.01 ± 0.06          | 0.03 ± 0.06          | -0.01 ± 0.04         | <b>13.18 ± 0.02</b> | -0.01 ± 0.02         | <b>38.21 ± 0.02</b> |
